# Supplementary material for: Development of a functional human induced pluripotent stem cell-derived nociceptor MEA system as a pain model for analgesic drug testing
Source: Frontiers journal article supplement (doi:10.3389/fcell.2023.1011145), 2023-03-01
Supplement: Data_Sheet_1.PDF [file Data_Sheet_1.PDF]

## *Supplementary Material*

### 1 Supplementary Tables

| Days in Differentiation | KSR | N2B | Factors                                      |
|-------------------------|-----|-----|----------------------------------------------|
| 0                       | 4   | 0   | LDN193189, SB431542                          |
| 1                       | 4   | 0   | LDN193189, SB431542                          |
| 2                       | 4   | 0   | LDN193189, SB431542, CHIR99021, SU5402, DAPT |
| 3                       | 4   | 0   | LDN193189, SB431542, CHIR99021, SU5402, DAPT |
| 4                       | 3   | 1   | LDN193189, SB431542, CHIR99021, SU5402, DAPT |
| 5                       | 3   | 1   | CHIR99021, SU5402, DAPT                      |
| 6                       | 2   | 2   | CHIR99021, SU5402, DAPT                      |
| 7                       | 2   | 2   | CHIR99021, SU5402, DAPT                      |
| 8                       | 1   | 3   | CHIR99021, SU5402, DAPT                      |
| 9                       | 1   | 3   | CHIR99021, SU5402, DAPT                      |
| 10                      | 0   | 4   | CHIR99021, SU5402, DAPT                      |
| 11                      | 0   | 4   | CHIR99021, SU5402, DAPT                      |

**Supplementary Table 1. Media replacing schedule during iPSC-nociceptor differentiation.**

| Chemicals | Company | Cat#    | Working Concentration |
|-----------|---------|---------|-----------------------|
| LDN193189 | Tocris  | 6053/10 | 100 nM                |
| SB431542  | Tocris  | 1614/1  | 6 $\mu$ M             |
| CHIR99021 | Tocris  | 4423/10 | 3 $\mu$ M             |
| SU5402    | Tocris  | 3300    | 6 $\mu$ M             |
| DAPT      | Tocris  | 2634/10 | 6 $\mu$ M             |

**Supplementary Table 2. Information of signaling factors in the nociceptor-induction medium.**

|            | Working Concentration | Company      | Cat. No  |
|------------|-----------------------|--------------|----------|
| Neurobasal |                       | ThermoFisher | 2110349  |
| B27        | 2%                    | ThermoFisher | 17504001 |
| N2         | 1%                    | ThermoFisher | 17504028 |
| Glutamax   | 1%                    | ThermoFisher | 35050079 |
| BDNF       | 25 ng/ml              | Cell Sci     | CRB600D  |
| NT3        | 25 ng/ml              | Cell Sci     | CRN500D  |
| NGF        | 25 ng/ml              | R&D systems  | 256-GF   |
| GDNF       | 25 ng/ml              | Cell Sci     | CRG400E  |

**Supplementary Table 3. Components of iPSC-nociceptor maturation medium.**
